# Supplementary material
Source: PubMed Central journal article supplement (PMC7328153)
Supplement: develop-147-187344-s1.pdf [file develop-147-187344-s1.pdf]

## SUPPLEMENTARY FIGURES

A

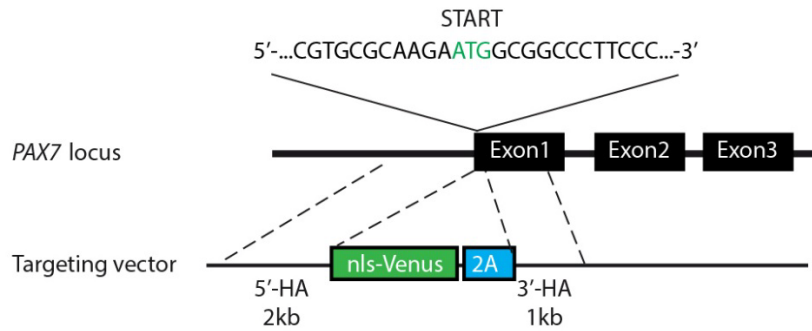

B

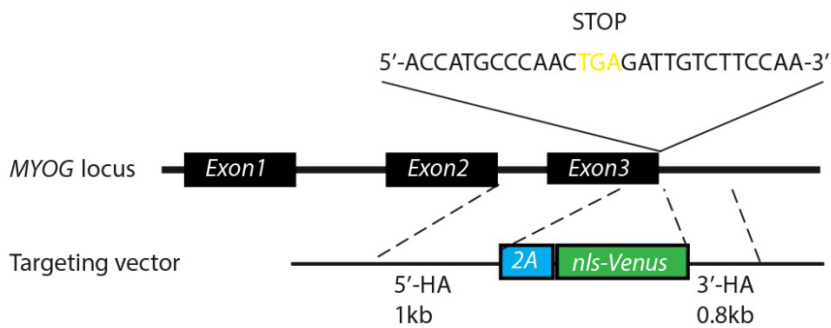

**Figure S1: Targeting strategy for iPS reporters**

Targeting strategies for hPAX7<sup>Venus</sup> (A), and hMYOG<sup>Venus</sup> (B) with CRISPR/CAS9. HA, homology arm; nls, nuclear localization signal; HA, homology arm; H2B for nuclear localization.

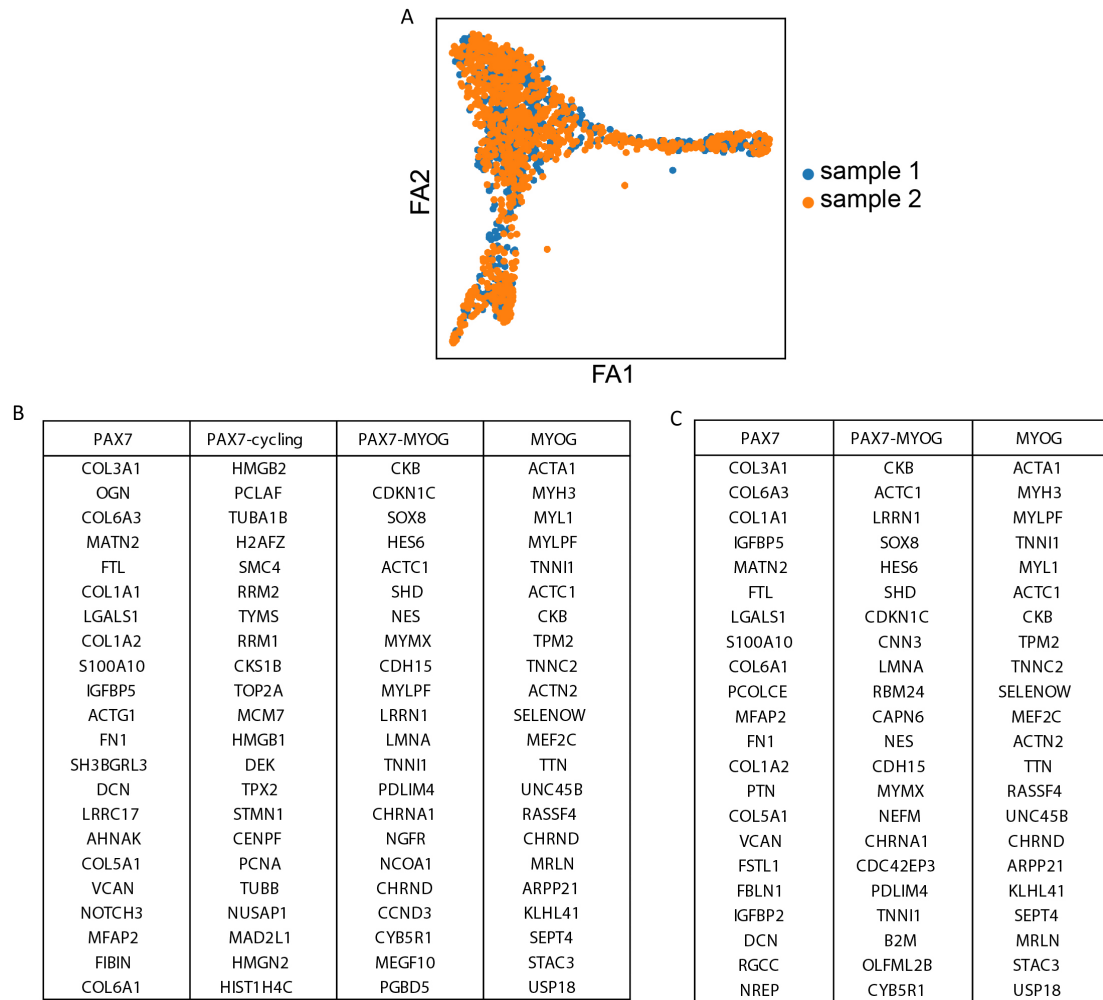

**Figure S2: Single cell analysis of PAX7-Venus cells**

(A) ForceAtlas2 directed layout showing overlap between PAX7-Venus positive cells analyzed from two myogenic cultures.

(B) Top 20 enriched transcripts for the four Louvain clusters relative to all other clusters detected by Wilcoxon rank-sum test. Transcripts are ranked by FDR-corrected p-values (Benjamini-Hochberg). See also Table S4.

(C) Top 20 enriched transcripts for the three Louvain clusters identified after regression of cell cycle genes relative to all other clusters detected by Wilcoxon rank-sum test. Transcripts are ranked by FDR-corrected p-values (Benjamini-Hochberg). See also Table S4.

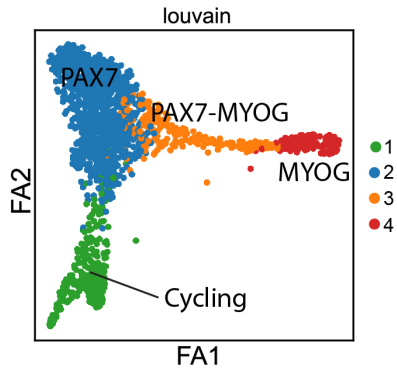

Cluster 1: cycling PAX7

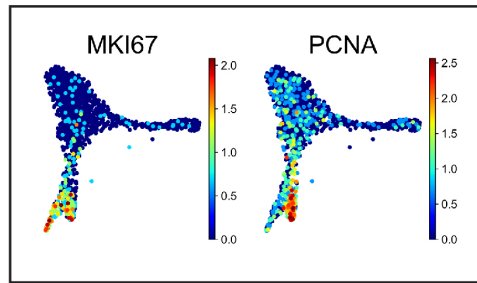

Cluster 2: PAX7

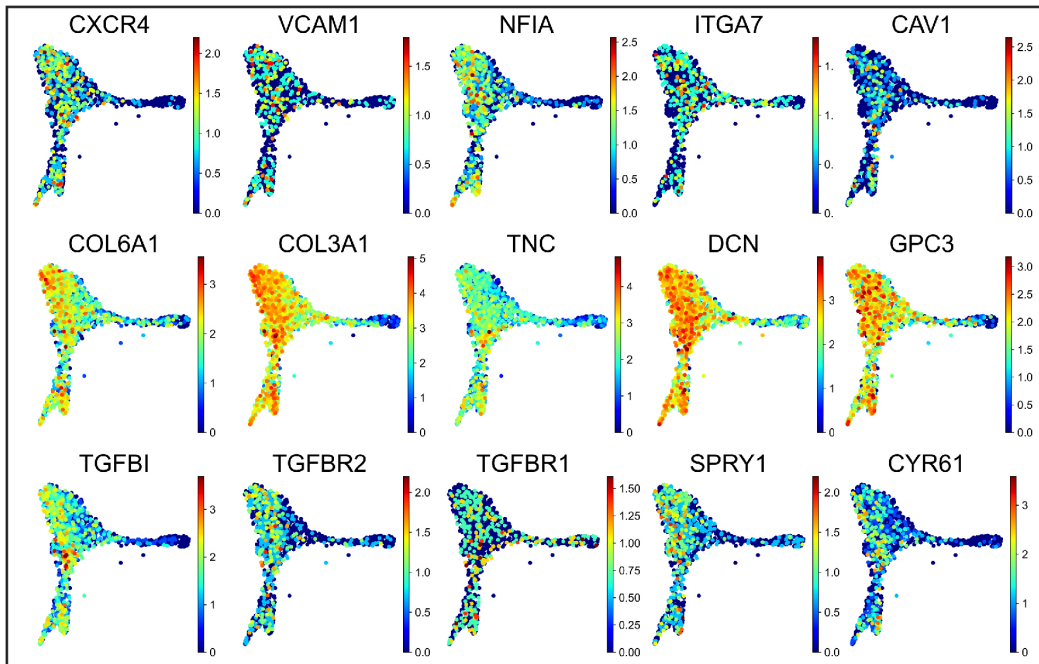

Cluster 3: PAX7-MYOG

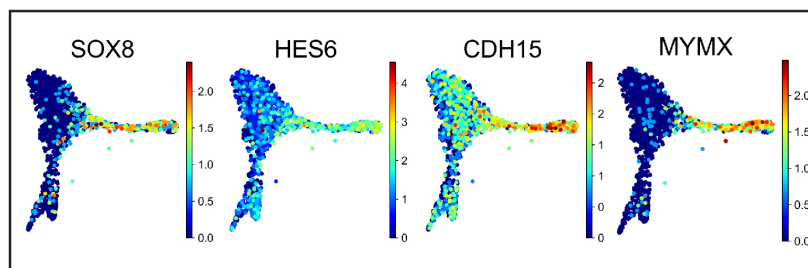

Cluster 4: MYOG

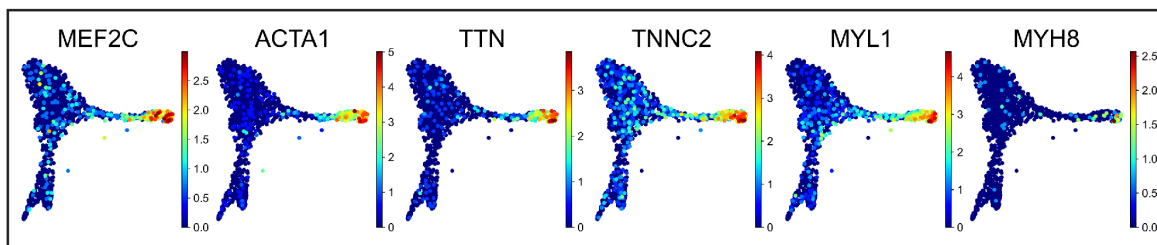

**Figure S3: Single cell analysis of PAX7-Venus cells**

ForceAtlas2 directed layout showing Louvain clusters and representative transcripts for each cluster.

Scale represents log-normalized transcript counts of indicated genes.

Table S1. List of genes upregulated in human PAX7Venus+ cells compared with undifferentiated hiPSCs

[Click here to Download Table S1](#)

Table S2. List of genes upregulated in mouse Pax7Gfp+ cells compared with undifferentiated ES

[Click here to Download Table S2](#)

Table S3. List of genes upregulated in human MYOGVenus+ cells compared with undifferentiated hiPSCs

[Click here to Download Table S3](#)

Table S4. Top 500 enriched transcripts for the four Louvain clusters shown in Fig. 2A relative to all the other clusters detected by the Wilcoxon rank-sum test. Transcripts are ranked by FDR-corrected P-values (Benjamini-Hochberg)

[Click here to Download Table S4](#)

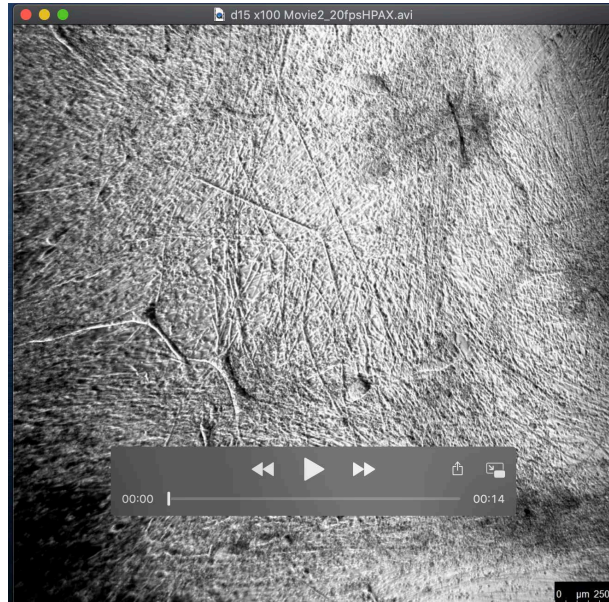

Movie 1. Twitching of human muscle fibers differentiated *in vitro* from PAX7<sup>Venus+</sup> cells FACS-sorted from 3-week-old cultures and replated for 2 weeks.
